# Supplementary figures and images for: The German Shorthair Pointer Dog Breed (Canis lupus familiaris): Genomic Inbreeding and Variability
Source: MDPI journal article supplement (doi:10.3390/ani10030498), 2020-03-17

## A) FHOM vs FPED

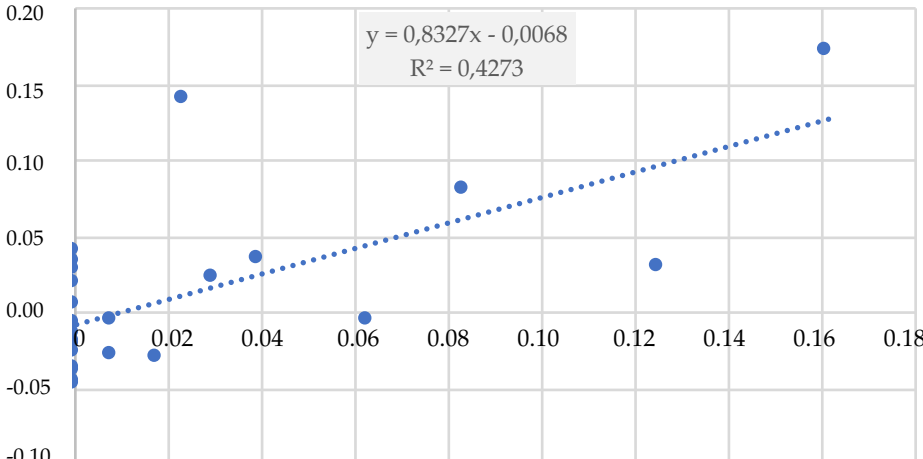

## B) FROH vs FPED

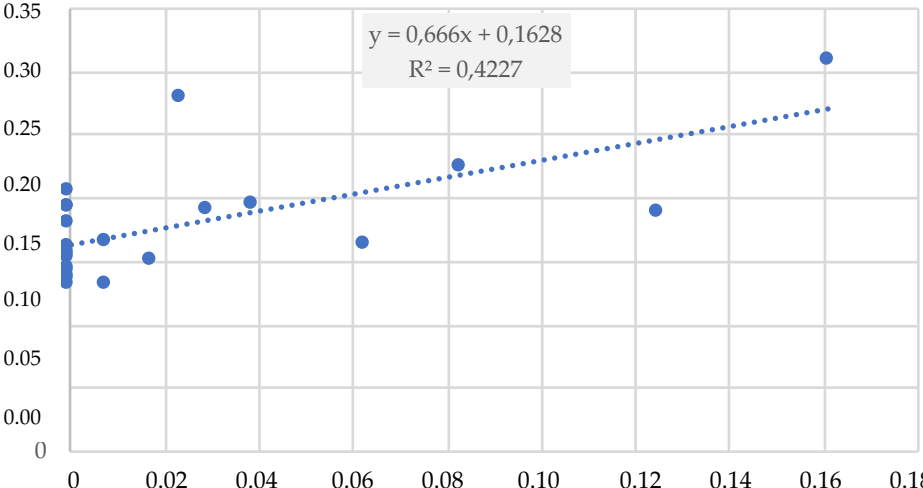

Supplement: s1 [file s1]

A)

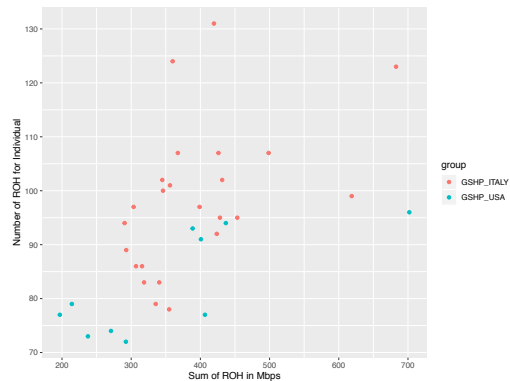

B)

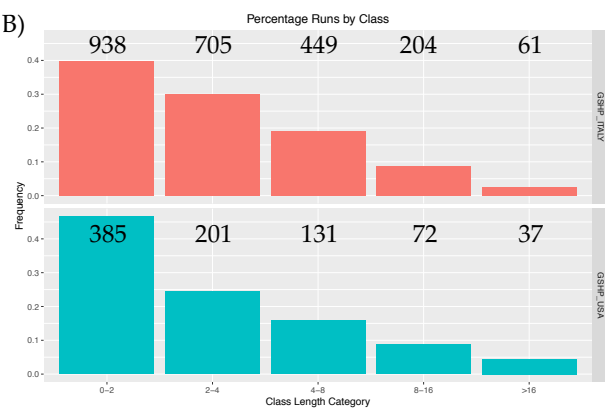

C)

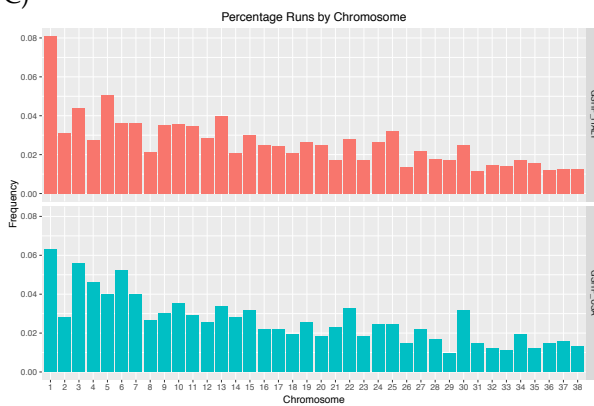

D)

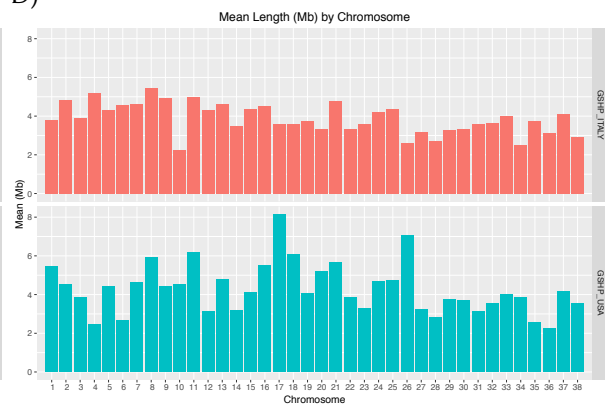

E)

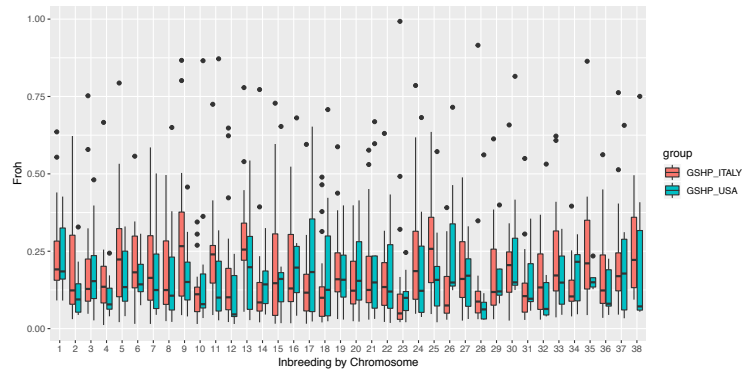

Supplement: s1 [file s1]

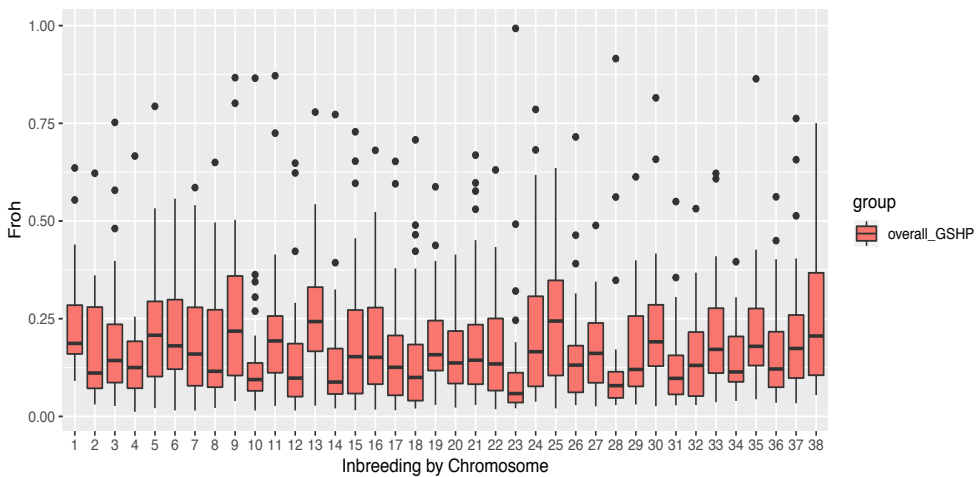

Supplement: s1 [file s1]
